# Supplementary material for: Constructing high-performance TADF polymers from non-TADF monomers: a computational investigation
Source: Royal Society of Chemistry journal article supplement (doi:10.1039/d2cp01698b), 2022-01-01
Supplement: d2cp01698b1.pdf [file d2cp01698b1.pdf]

## **Supporting Information**

### **Constructing high-performance TADF polymers from non-TADF monomers: a computation investigation**

Ping Li, Cefeng Zhou, Yewen Zhang, Cailin Chen, Chao Zheng\* and Runfeng Chen\*

*State Key Laboratory of Organic Electronics and Information Displays & Institute of Advanced  
Materials(IAM), Nanjing University of Posts & Telecommunications, 9 Wenyuan Road, Nanjing  
210023, China.*

## Contents

Fig. S1 Predicted  $\Delta E_{ST}$  values of oligomers of A1 with different chain length polymerized at 3, 7-sites or 2, 7-sites.

Fig. S2 Predicted HOMO/LUMO energy levels,  $S_1/T_1$  excited energies and  $\Delta E_{ST}$  values for oligomers with different numbers of repeating units (A1).

Fig. S3 The electron-density distribution of oligomers with different numbers of repeating units (A1).

Fig. S4 Optimized ground-state and lowest-lying excited state geometry structures of the monomers and trimers.

Fig. S5-7 Geometry variations between  $S_0$ ,  $S_1$  and  $T_1$  states of the monomers and the trimers.

Fig. S8-10 Calculated frontier orbital energy levels, frontier orbitals distribution and HOMO-LUMO overlap extent ( $I_{H/L}$ ).

Fig. S11 Correlation between singlet-triplet energy splitting ( $\Delta E_{ST}$ ) and HOMO-LUMO overlap extent ( $I_{H/L}$ ) for the investigated monomers.

Fig. S12-14 Calculated HOMO energy levels for the investigated monomers, polymers and their corresponding acceptors of series A, B and C.

Fig. S15-17 Linear relation between the HOMO and LUMO energy levels and reciprocal chain length of oligomers.

Fig. S18-19 Simulated absorption and emission spectra for the monomers and the corresponding trimers.

Fig. S20-22 NTO distributions and overlap extents ( $I_s$ ) at  $S_1$  states for the investigated materials.

Fig. S23 Correlation between singlet-triplet energy splitting ( $\Delta E_{ST}$ ) and HOMO-LUMO overlap extent ( $I_s$ ) for the investigated polymers.

Table S1 Calculated frontier orbital energy levels, band gaps, excited-state energies and  $\Delta E_{ST}$  values with different DFT functionals.

Table S2 Calculated frontier orbital energy levels, band gaps, excited-state energies and  $\Delta E_{ST}$  values with different basis sets.

Table S3 Selected geometrical parameters of the investigated materials in the ground state ( $S_0$ ) and the lowest singlet/triplet excited state ( $S_1/T_1$ ).

Table S4 Calculated maximum absorption/emission wavelengths, oscillator strengths, and transition characters for the investigated materials.

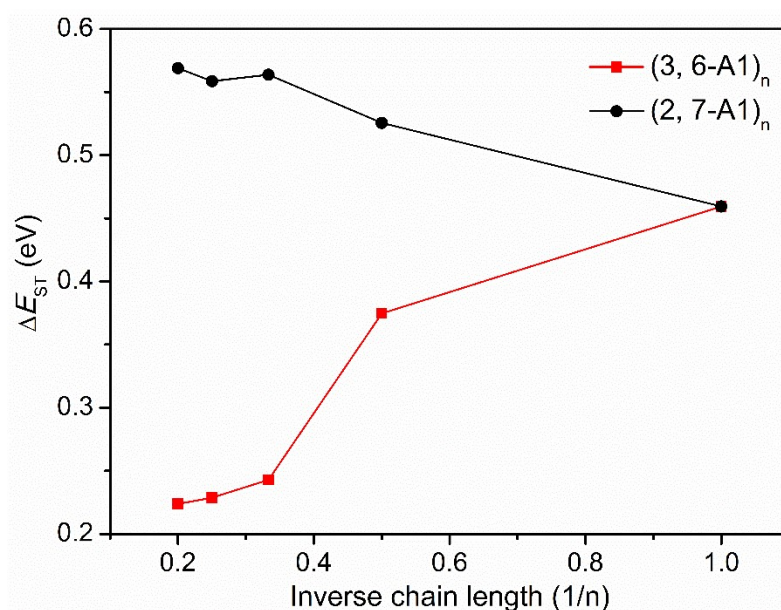

**Fig. S1** Predicted  $\Delta E_{ST}$  values of oligomers of A1 with different chain length polymerized at 3, 7-sites or 2, 7-sites.

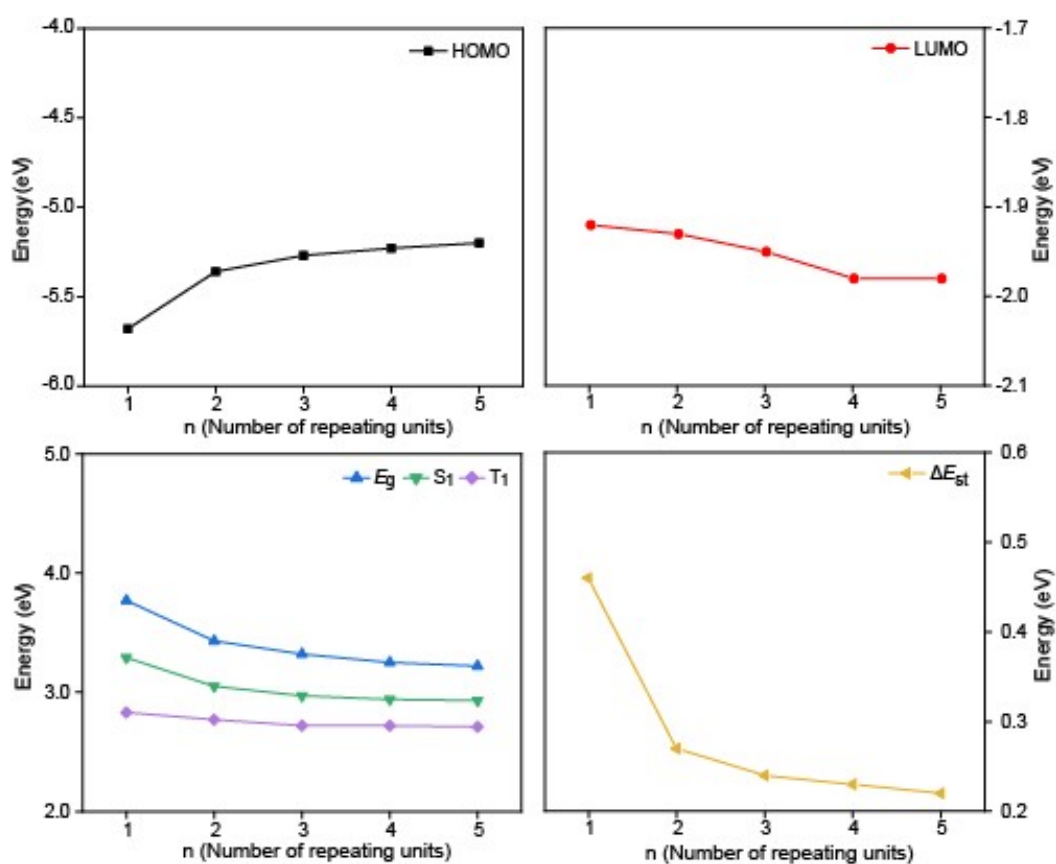

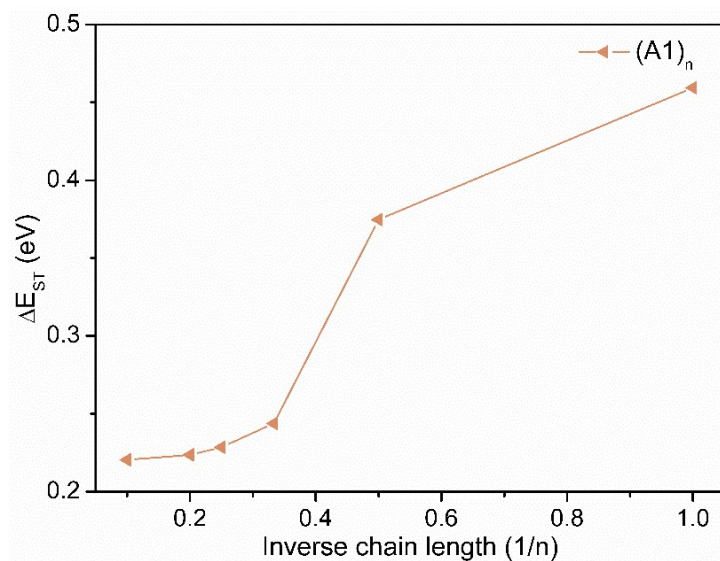

**Fig. S2** Predicted HOMO/LUMO energy levels,  $S_1/T_1$  excited energies and  $\Delta E_{ST}$  values for oligomers with different numbers of repeating units (A1) at B3LYP/ def2sv levels.

|     |                                                                                                         |                                                                                                           |  |  |  |
|-----|---------------------------------------------------------------------------------------------------------|-----------------------------------------------------------------------------------------------------------|--|--|--|
| n=1 | 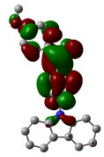<br>LUMO<br>-1.92 eV  |                                                                                                           |  |  |  |
|     | <br>HOMO<br>-5.68 eV |                                                                                                           |  |  |  |
| n=2 | <br>LUMO<br>-1.93 eV | <br>LUMO+1<br>-1.91 eV |  |  |  |
|     | <br>HOMO             | <br>HOMO-1             |  |  |  |

|     |                                                                                                         |                                                                                                           |                                                                                                           |                                                                                                            |                                                                                                             |
|-----|---------------------------------------------------------------------------------------------------------|-----------------------------------------------------------------------------------------------------------|-----------------------------------------------------------------------------------------------------------|------------------------------------------------------------------------------------------------------------|-------------------------------------------------------------------------------------------------------------|
|     | -5.36 eV                                                                                                | -5.87 eV                                                                                                  |                                                                                                           |                                                                                                            |                                                                                                             |
| n=3 | 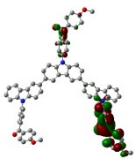<br>LUMO<br>-1.95 eV   | <br>LUMO+1<br>-1.92 eV   | <br>LUMO+2<br>-1.89 eV   |                                                                                                            |                                                                                                             |
|     | <br>HOMO<br>-5.27 eV   | <br>HOMO-1<br>-5.55 eV   | <br>HOMO-2<br>-5.92 eV   |                                                                                                            |                                                                                                             |
| n=4 | <br>LUMO<br>-1.98 eV  | <br>LUMO+1<br>-1.94 eV  | <br>LUMO+2<br>-1.90 eV  | <br>LUMO+3<br>-1.87 eV  |                                                                                                             |
|     | <br>HOMO<br>-5.23 eV | <br>HOMO-1<br>-5.41 eV | <br>HOMO-2<br>-5.66 eV | <br>HOMO-3<br>-5.93 eV |                                                                                                             |
| n=5 | <br>LUMO<br>-1.98 eV | <br>LUMO+1<br>-1.96 eV | <br>LUMO+2<br>-1.92 eV | <br>LUMO+3<br>-1.90 eV | <br>LUMO+4<br>-1.87 eV |
|     | <br>HOMO<br>-5.20 eV | <br>HOMO-1<br>-5.34 eV | <br>HOMO-2<br>-5.52 eV | <br>HOMO-3<br>-5.72 eV | <br>HOMO-4<br>-5.93 eV |

**Fig. S3** The electron-density distribution of oligomers with different numbers of repeating units (A1).

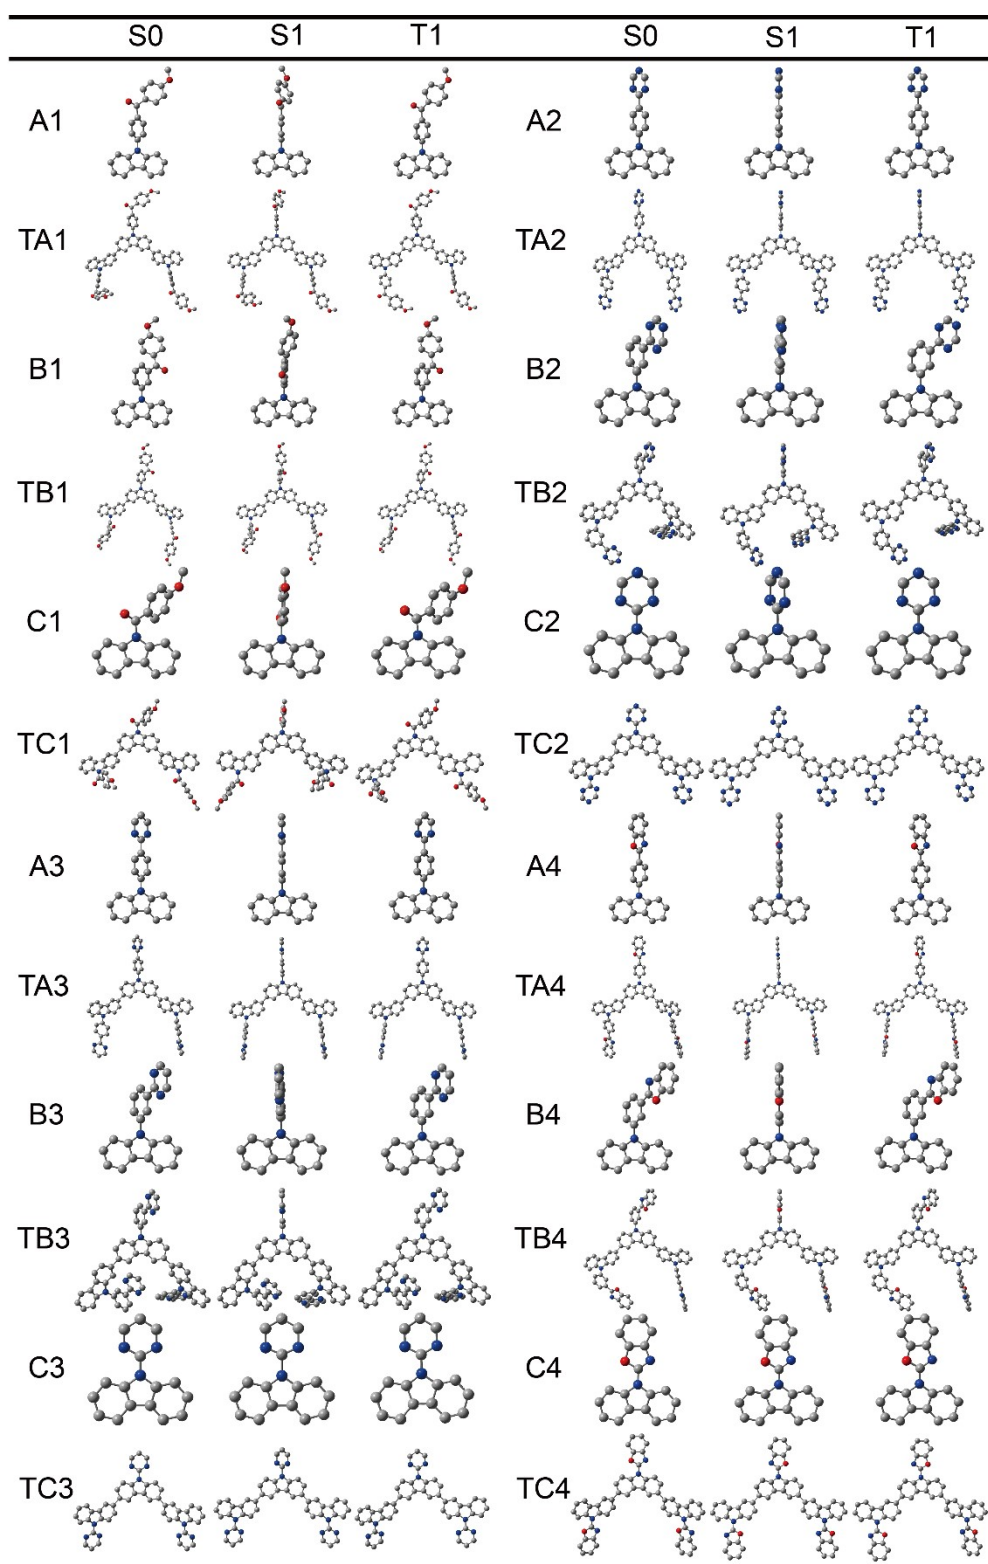

**Fig. S4** Optimized ground-state and lowest-lying excited state geometry structures of the monomers and the trimers.

| Material | $S_0$ Vs $S_1$                                                                     | $S_0$ Vs $T_1$                                                                     | $S_1$ Vs $T_1$                                                                      |
|----------|------------------------------------------------------------------------------------|------------------------------------------------------------------------------------|-------------------------------------------------------------------------------------|
| A2       |   |   |   |
|          | RMSD=0.57 Å                                                                        | RMSD=0.04 Å                                                                        | RMSD=0.60 Å                                                                         |
| TA2      |   |   |   |
|          | RMSD=0.55 Å                                                                        | RMSD=0.53 Å                                                                        | RMSD=0.02 Å                                                                         |
| B2       |   |   |   |
|          | RMSD=0.66 Å                                                                        | RMSD=0.17 Å                                                                        | RMSD=0.82 Å                                                                         |
| TB2      |   |   |   |
|          | RMSD=0.93 Å                                                                        | RMSD=0.63 Å                                                                        | RMSD=0.59 Å                                                                         |
| C2       |   |   |   |
|          | RMSD=0.61 Å                                                                        | RMSD=0.03 Å                                                                        | RMSD=0.61 Å                                                                         |
| TC2      |  |  |  |
|          | RMSD=0.48 Å                                                                        | RMSD=0.89 Å                                                                        | RMSD=0.82 Å                                                                         |

**Fig. S5** Geometry variations between  $S_0$ ,  $S_1$  and  $T_1$  states of A2, B2 and C2 as well as the trimers of TA2, TB2 and TC2.

| Material | $S_0$ Vs $S_1$                                                                      | $S_0$ Vs $T_1$                                                                      | $S_1$ Vs $T_1$                                                                       |
|----------|-------------------------------------------------------------------------------------|-------------------------------------------------------------------------------------|--------------------------------------------------------------------------------------|
| A3       | 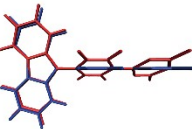 |  |  |
|          | RMSD=0.55 Å                                                                         | RMSD=0.07 Å                                                                         | RMSD=0.62 Å                                                                          |
| TA3      |  |  |  |
|          | RMSD=0.57 Å                                                                         | RMSD=0.14 Å                                                                         | RMSD=0.51 Å                                                                          |
| B3       |  |  |  |
|          | RMSD=0.61 Å                                                                         | RMSD=0.23 Å                                                                         | RMSD=0.82 Å                                                                          |
| TB3      |  |  |  |
|          | RMSD=0.68 Å                                                                         | RMSD=0.12 Å                                                                         | RMSD=0.77 Å                                                                          |
| C3       |  |  |  |
|          | RMSD=0.05 Å                                                                         | RMSD=0.03 Å                                                                         | RMSD=0.05 Å                                                                          |
| TC3      |  |  |  |
|          | RMSD=0.49 Å                                                                         | RMSD=0.95 Å                                                                         | RMSD=0.80 Å                                                                          |

**Fig. S6** Geometry variations between  $S_0$ ,  $S_1$  and  $T_1$  states of A3, B3 and C3 as well as the trimers of TA3, TB3 and TC3.



| Material | $S_0$ Vs $S_1$             | $S_0$ Vs $T_1$             | $S_1$ Vs $T_1$             |
|----------|----------------------------|----------------------------|----------------------------|
| A4       |                            |                            |                            |
| TA4      | RMSD=0.57 Å<br>RMSD=0.73 Å | RMSD=0.05 Å<br>RMSD=0.10 Å | RMSD=0.61 Å<br>RMSD=0.67 Å |
| B4       |                            |                            |                            |
| TB4      | RMSD=0.79 Å<br>RMSD=1.04 Å | RMSD=0.10 Å<br>RMSD=0.14 Å | RMSD=0.83 Å<br>RMSD=1.03 Å |
| C4       |                            |                            |                            |
| TC4      | RMSD=0.03 Å<br>RMSD=0.57 Å | RMSD=0.03 Å<br>RMSD=1.03 Å | RMSD=0.04 Å<br>RMSD=0.66 Å |

**Fig. S7** Geometry variations between  $S_0$ ,  $S_1$  and  $T_1$  states of A4, B4 and C4 as well as the trimers of TA4, TB4 and TC4.

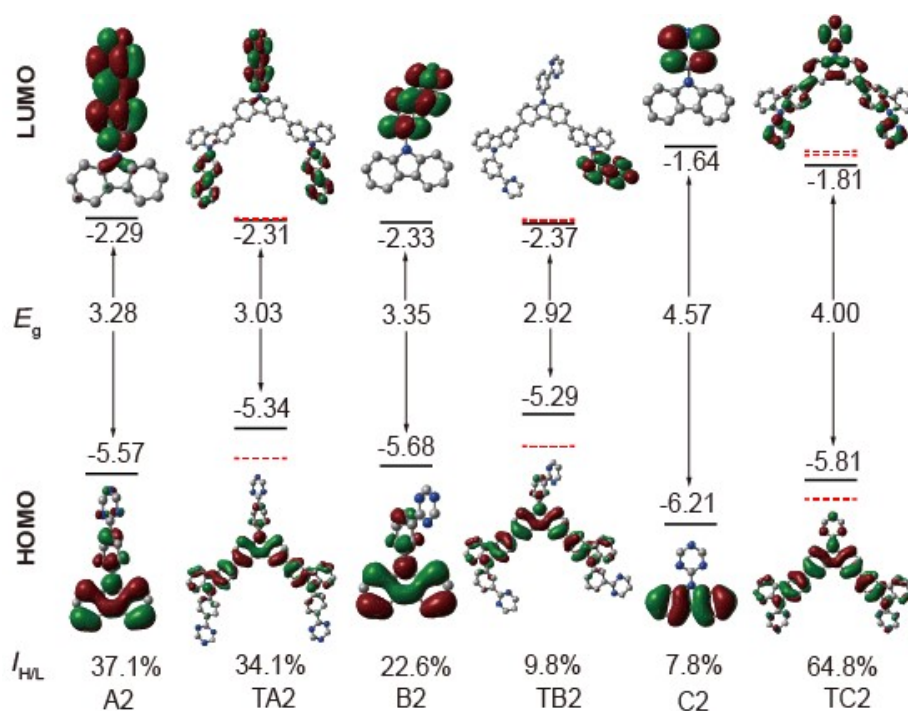

**Fig. S8** Calculated frontier orbital energy levels, frontier orbitals distribution and HOMO-LUMO overlap extent ( $I_{H/L}$ ) for A2, B2, C2 and the trimers of TA2, TB2 and TC2.

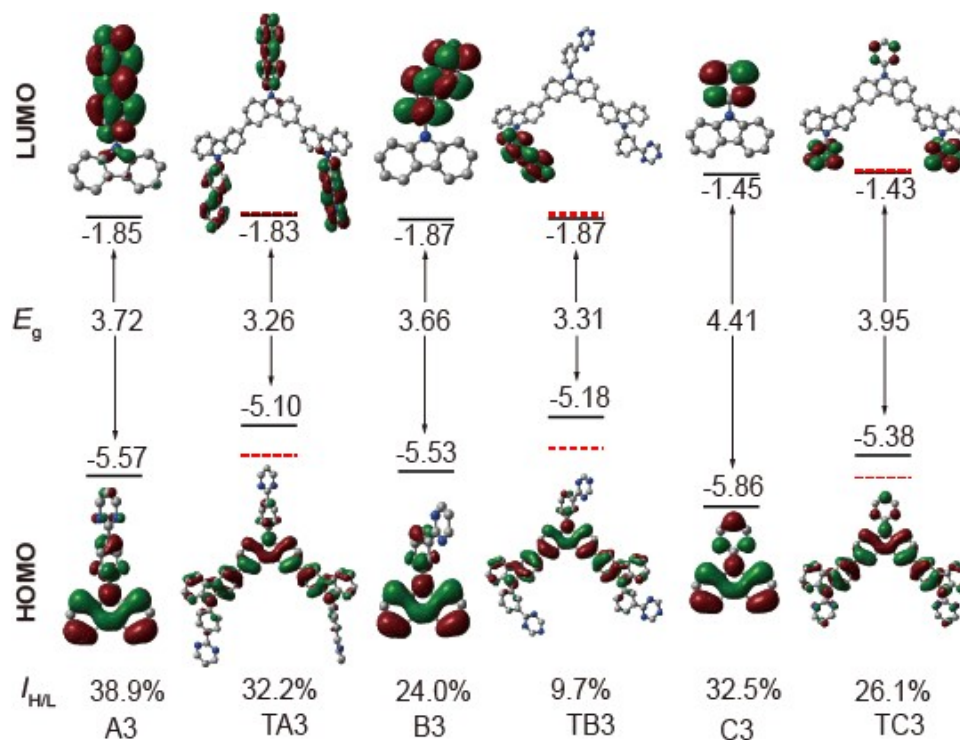

**Fig. S9** Calculated frontier orbital energy levels levels, frontier orbitals distribution and HOMO-LUMO overlap extent ( $I_{HL}$ ) for A3, B3, C3 and the trimers of TA3, TB3 and TC3.

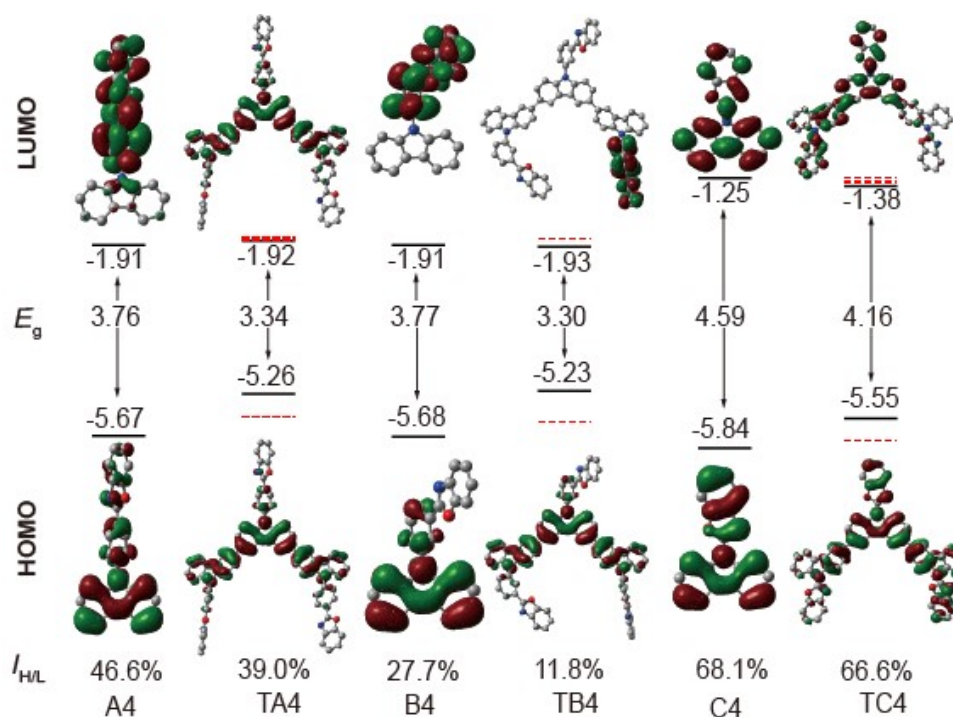

**Fig. S10** Calculated frontier orbital energy levels levels, frontier orbitals distribution and HOMO-LUMO overlap extent ( $I_{HL}$ ) for A4, B4, C4 and the trimers of TA4, TB4 and TC4.

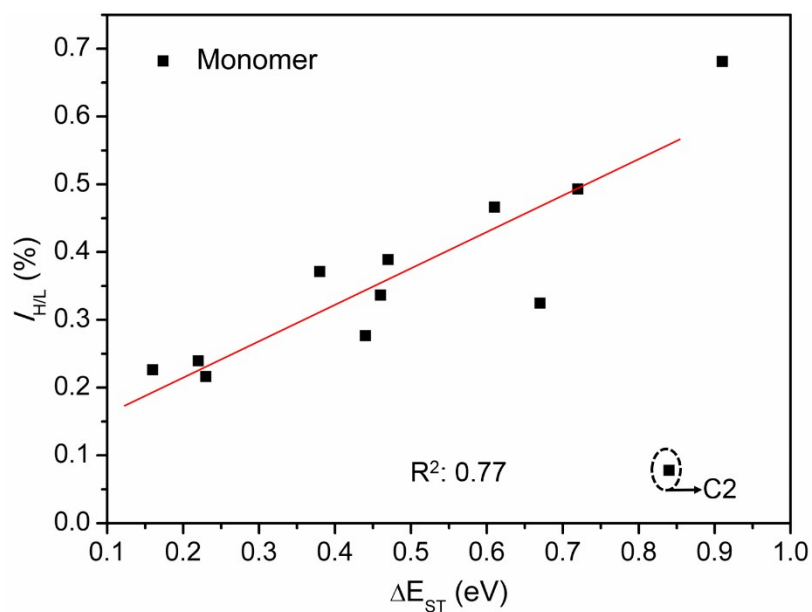

**Fig. S11** Correlation between singlet-triplet energy splitting ( $\Delta E_{ST}$ ) and HOMO-LUMO overlap extent ( $I_{H/L}$ ) for the investigated monomers except for C2.

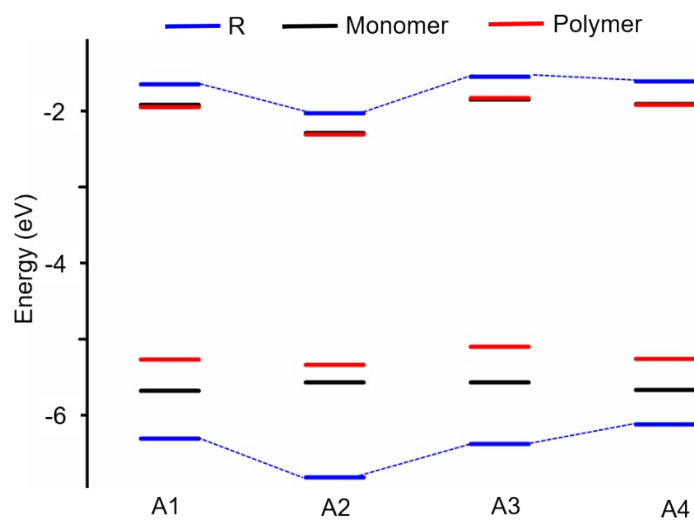

**Fig. S12** Calculated HOMO energy levels for the investigated monomers, polymers and their corresponding R units of series A.

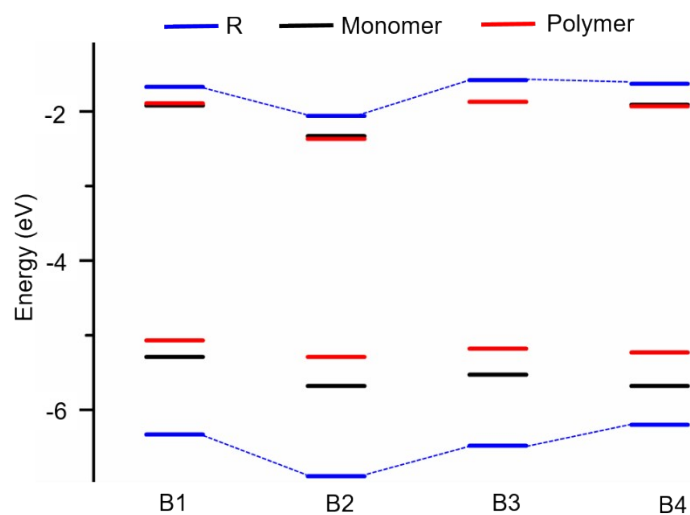

**Fig. S13** Calculated HOMO energy levels for the investigated monomers, polymers and their corresponding R units of series B.

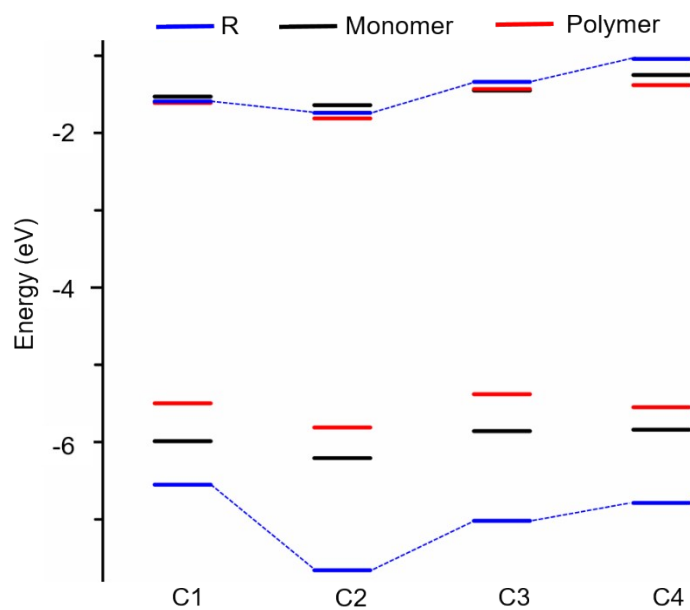

**Fig. S14** Calculated HOMO energy levels for the investigated monomers, polymers and their corresponding R units of series C.

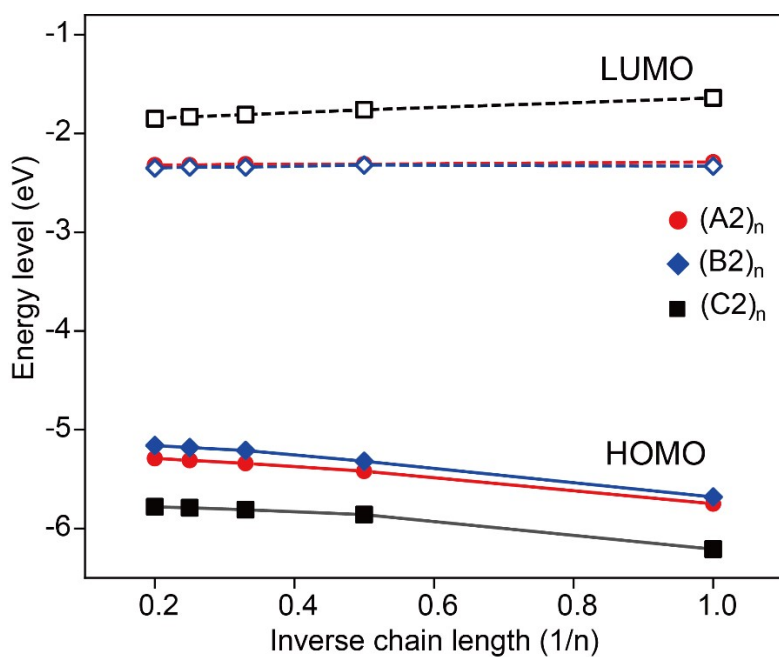

**Fig. S15** Linear relation between the HOMO and LUMO energy levels and reciprocal chain length of oligomers.

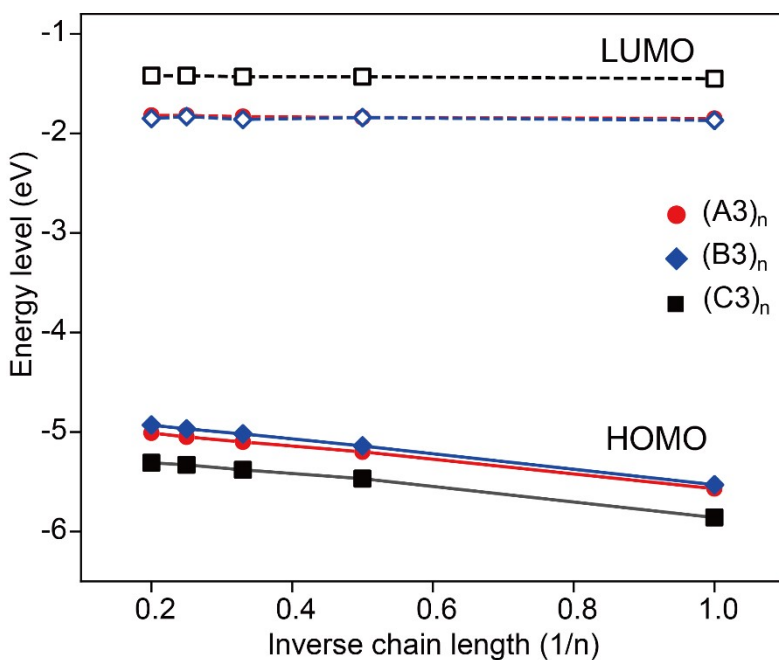

**Fig. S16** Linear relation between the HOMO and LUMO energy levels and reciprocal chain length of oligomers.

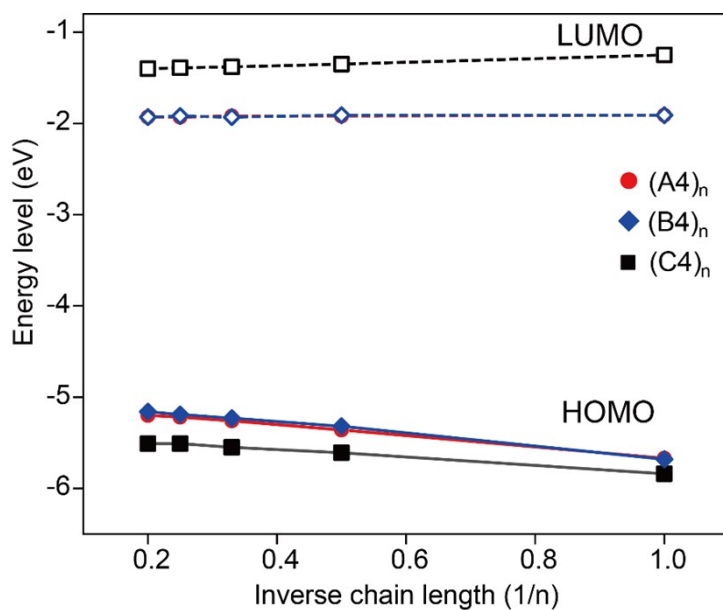

**Fig. S17** Linear relation between the HOMO and LUMO energy levels and reciprocal chain length of oligomers.

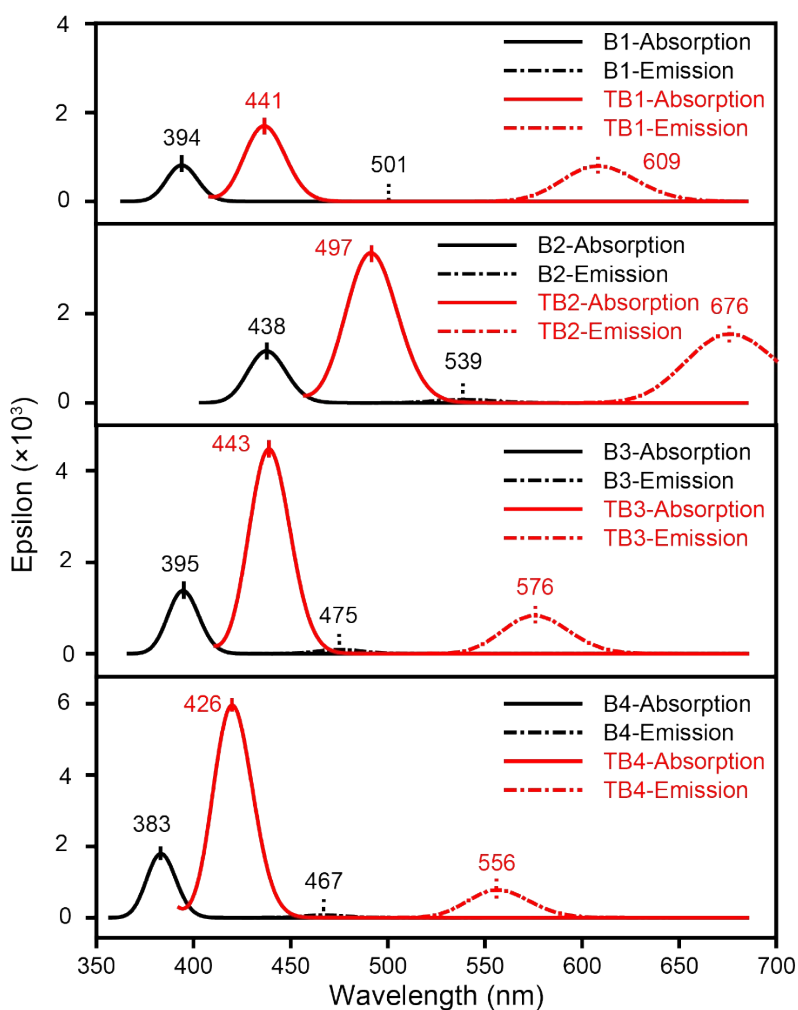

**Fig. S18** Simulated absorption and emission spectra of B1-B4 and their trimers of TB1-TB4.

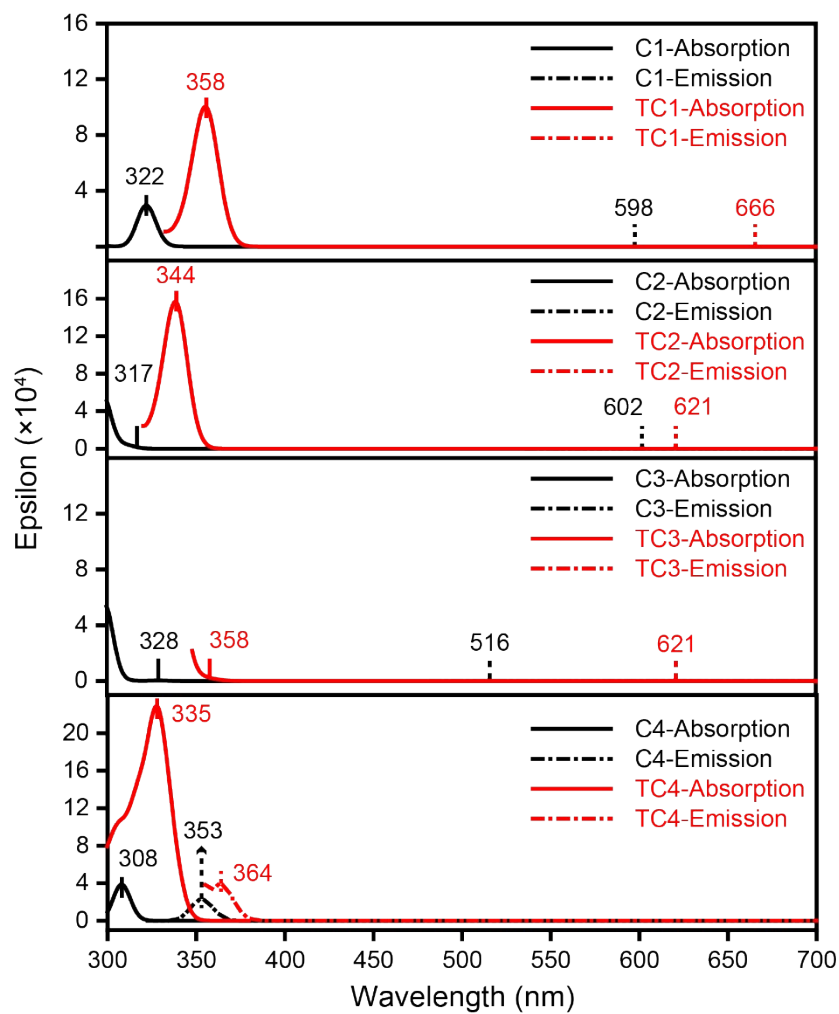

**Fig. S19** Simulated absorption and emission spectra of C1-C4 and their trimers of TC1-TC4.

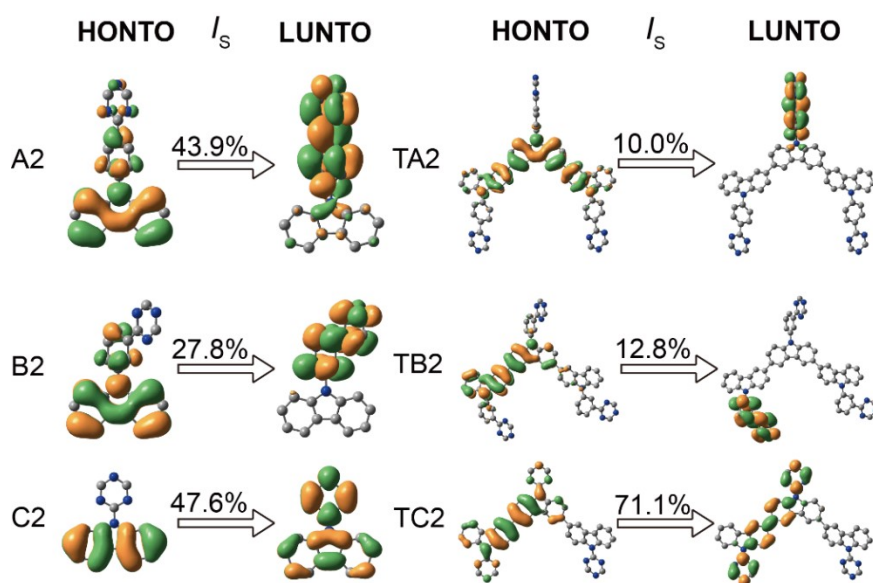

**Fig. S20** NTO distributions and overlap extents ( $I_s$ ) at  $S_1$  states for the A2, B2, C2 and the trimers of TA2, TB2 and TC2.

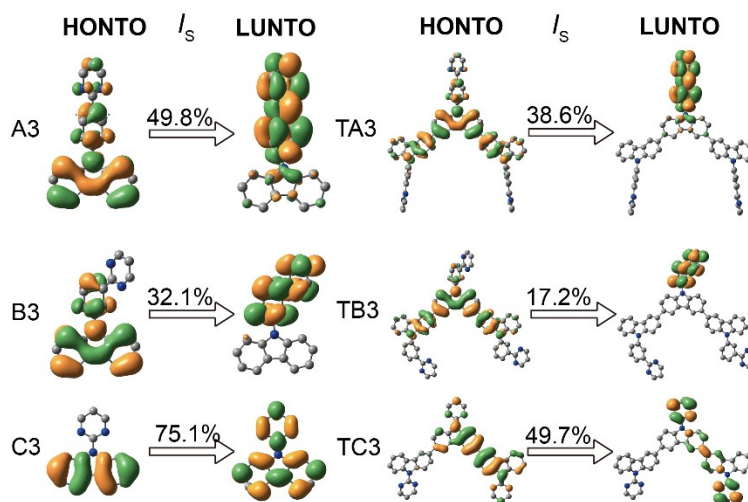

**Fig. S21** NTO distributions and overlap extents ( $I_s$ ) at  $S_1$  states for the A3, B3, C3 and the trimers TA3, TB3 and TC3.

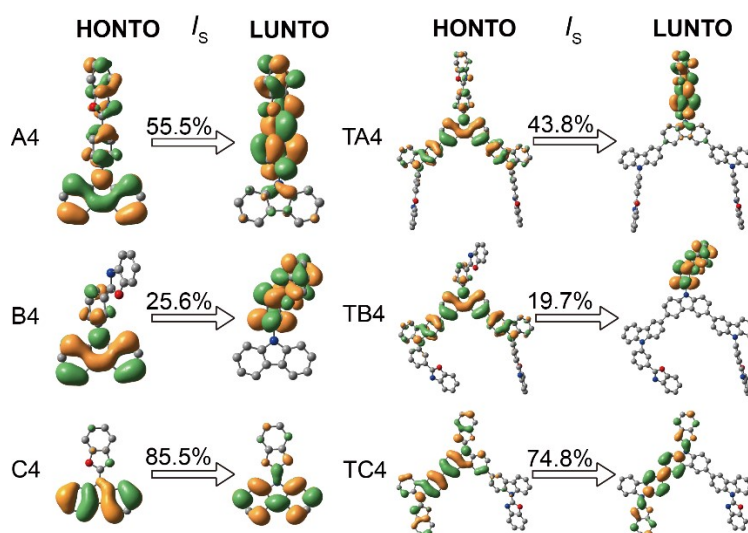

**Fig. S22** NTO distributions and overlap extents ( $I_s$ ) at  $S_1$  states for the A4, B4, C4 and the trimers of TA4, TB4 and TC4.



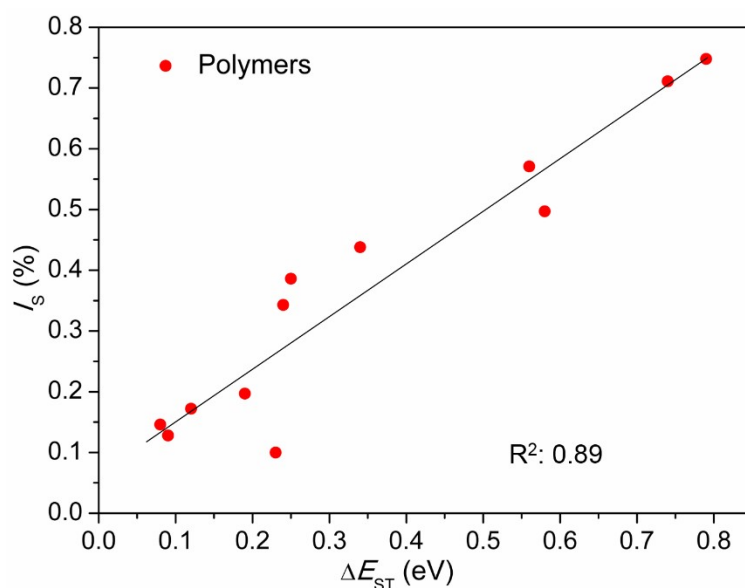

**Fig. S23** Correlation between singlet-triplet energy splitting ( $\Delta E_{ST}$ ) and HONTO-LUNTO overlap extent ( $I_s$ ) for the investigated polymers.

**Table S1** Calculated frontier orbital energy levels, band gaps, excited-state energies and  $\Delta E_{ST}$  values with different DFT functionals for A1 and its oligomers (Unit: eV).

| Functional | Number of repeating units | HOMO  | LUMO  | $E_g$ | $S_1$ | $T_1$ | $\Delta E_{ST}$ |
|------------|---------------------------|-------|-------|-------|-------|-------|-----------------|
| B3LYP      | n=1                       | -5.68 | -1.92 | 3.77  | 3.29  | 2.83  | 0.46            |
|            | n=2                       | -5.36 | -1.93 | 3.43  | 3.05  | 2.77  | 0.27            |
|            | n=3                       | -5.27 | -1.95 | 3.32  | 2.97  | 2.72  | 0.24            |
|            | n=4                       | -5.23 | -1.98 | 3.25  | 2.94  | 2.72  | 0.23            |
|            | n=5                       | -5.20 | -1.98 | 3.22  | 2.93  | 2.71  | 0.22            |
| B3LYP+D3   | n=1                       | -5.68 | -1.90 | 3.79  | 3.31  | 2.83  | 0.48            |
|            | n=2                       | -5.36 | -1.92 | 3.45  | 3.06  | 2.77  | 0.29            |
|            | n=3                       | -5.27 | -1.94 | 3.33  | 3.04  | 2.72  | 0.32            |
|            | n=4                       | -5.23 | -1.96 | 3.27  | 2.96  | 2.72  | 0.24            |
|            | n=5                       | -5.21 | -1.97 | 3.24  | 2.96  | 2.71  | 0.24            |
| BMK        | n=1                       | -6.41 | -1.23 | 5.18  | 3.72  | 3.06  | 0.66            |
|            | n=2                       | -6.06 | -1.25 | 4.81  | 3.70  | 3.06  | 0.64            |
|            | n=3                       | -5.96 | -1.27 | 4.69  | 3.67  | 3.05  | 0.62            |
|            | n=4                       | -5.91 | -1.30 | 4.61  | 3.66  | 3.05  | 0.61            |
|            | n=5                       | -5.89 | -1.30 | 4.58  | 3.66  | 3.05  | 0.61            |
| CAMB3LYP   | n=1                       | -6.97 | -0.71 | 6.26  | 3.86  | 2.93  | 0.93            |
|            | n=2                       | -6.59 | -0.72 | 5.86  | 3.86  | 2.82  | 1.04            |
|            | n=3                       | -6.49 | -0.74 | 5.74  | 3.86  | 2.78  | 1.08            |
|            | n=4                       | -6.43 | -0.77 | 5.66  | 3.85  | 2.75  | 1.10            |

|         |     |       |       |      |       |      |       |
|---------|-----|-------|-------|------|-------|------|-------|
|         | n=5 | -6.41 | -0.77 | 5.63 | 3.85  | 2.74 | 1.12  |
| M062X   | n=1 | -6.92 | -1.05 | 5.87 | 3.65  | 3.12 | 0.53  |
|         | n=2 | -6.56 | -1.07 | 5.48 | 3.65  | 3.13 | 0.52  |
|         | n=3 | -6.46 | -1.09 | 5.37 | 3.65  | 3.12 | 0.52  |
|         | n=4 | -6.41 | -1.12 | 5.29 | 3.65  | 3.12 | 0.52  |
|         | n=5 | -6.38 | -1.12 | 5.26 | 3.65  | 3.12 | 0.52  |
| PBE1PBE | n=1 | -5.95 | -1.83 | 4.12 | 3.47  | 2.82 | 0.65  |
|         | n=2 | -5.62 | -1.85 | 3.77 | 3.26  | 2.79 | 0.47  |
|         | n=3 | -5.54 | -1.87 | 3.67 | 3.18  | 2.77 | 0.41  |
|         | n=4 | -5.49 | -1.90 | 3.59 | 3.16  | 2.76 | 0.40  |
|         | n=5 | -5.47 | -1.90 | 3.56 | 3.15  | 2.76 | 0.39  |
| wB97XD  | n=1 | -7.56 | -0.17 | 7.40 | 3.85  | 3.05 | 0.81  |
|         | n=2 | -7.18 | -0.19 | 6.99 | 3.86  | 2.98 | 0.88  |
|         | n=3 | -7.08 | -0.21 | 6.87 | 3.86  | 2.94 | 0.92  |
|         | n=4 | -7.03 | -0.23 | 6.79 | 3.86  | 2.92 | 0.94  |
|         | n=5 | -7.00 | -0.24 | 6.76 | 3.86  | 2.90 | 0.95  |
| Exp.    | A1  | -5.96 | -3.03 | 2.93 | 3.035 | --   | 0.442 |
|         | P1  | -5.66 | -3.10 | 2.56 | 2.689 | --   | 0.233 |

**Table S2** Calculated frontier orbital energy levels, band gaps, excited-state energies and  $\Delta E_{ST}$  values with different basis sets for A1 and its trimers (Unit: eV).

| Material   | Method          | HOMO  | LUMO  | $E_g$ | $S_1$ | $T_1$ | $\Delta E_{ST}$ |
|------------|-----------------|-------|-------|-------|-------|-------|-----------------|
| <b>A1</b>  | B3LYP/def2sv    | -5.68 | -1.92 | 3.77  | 3.29  | 2.83  | 0.46            |
|            | B3LYP/def2sv+D3 | -5.68 | -1.90 | 3.79  | 3.31  | 2.83  | 0.48            |
|            | B3LYP/6-31+g*   | -5.73 | -2.06 | 3.66  | 3.19  | 2.81  | 0.38            |
|            | B3LYP/6-311g*   | -5.67 | -1.93 | 3.74  | 3.27  | 2.85  | 0.42            |
|            | <b>Exp.</b>     |       | -5.96 | -3.03 | 2.93  | 3.035 | --              |
| <b>TA1</b> | B3LYP/def2sv    | -5.27 | -1.95 | 3.32  | 2.97  | 2.74  | 0.24            |
|            | B3LYP/def2sv+D3 | -5.27 | -1.94 | 3.34  | 2.98  | 2.72  | 0.26            |
|            | B3LYP/6-31+g*   | -5.32 | -2.10 | 3.22  | 2.87  | 2.67  | 0.20            |
|            | B3LYP/6-311g*   | -5.29 | -1.96 | 3.32  | 2.96  | 2.74  | 0.22            |
|            | <b>Exp.</b>     |       | -5.66 | -3.10 | 2.56  | 2.689 | --              |

**Table S3** Selected geometrical parameters of the investigated molecules in the ground state ( $S_0$ ) and the lowest singlet/triplet excited state ( $S_1/T_1$ ).

| Material | $S_0$         |               | $S_1$         |               | $T_1$         |               |
|----------|---------------|---------------|---------------|---------------|---------------|---------------|
|          | $l_{N-R}$ (Å) | $\varphi$ (°) | $l_{N-R}$ (Å) | $\varphi$ (°) | $l_{N-R}$ (Å) | $\varphi$ (°) |
| A1       | 1.42          | 53.7          | 1.45          | 91.7          | 1.41          | 53.5          |
| TA1      | 1.42          | 53.0          | 1.45          | 90.9          | 1.42          | 53.6          |
| A2       | 1.41          | 52.2          | 1.45          | 90.0          | 1.41          | 49.2          |
| TA2      | 1.41          | 51.7          | 1.45          | 90.4          | 1.45          | 88.7          |
| A3       | 1.42          | 53.8          | 1.45          | 90.0          | 1.40          | 47.9          |
| TA3      | 1.42          | 52.6          | 1.45          | 90.3          | 1.41          | 48.9          |
| A4       | 1.42          | 53.8          | 1.45          | 90.1          | 1.41          | 50.5          |
| TA4      | 1.42          | 52.8          | 1.45          | 90.5          | 1.41          | 49.6          |
| B1       | 1.42          | 54.4          | 1.46          | 81.8          | 1.42          | 57.2          |
| TB1      | 1.42          | 52.9          | 1.46          | 75.5          | 1.45          | 60.6          |
| B2       | 1.42          | 57.0          | 1.46          | 87.8          | 1.42          | 46.8          |
| TB2      | 1.42          | 56.1          | 1.46          | 84.3          | 1.45          | 59.4          |
| B3       | 1.42          | 58.0          | 1.46          | 85.5          | 1.41          | 45.3          |
| TB3      | 1.42          | 56.2          | 1.46          | 84.2          | 1.43          | 50.2          |
| B4       | 1.42          | 57.1          | 1.46          | 90.5          | 1.42          | 55.5          |
| TB4      | 1.42          | 55.3          | 1.46          | 89.0          | 1.42          | 52.9          |
| C1       | 1.41          | 37.2          | 1.55          | 82.7          | 1.41          | 32.0          |
| TC1      | 1.41          | 36.5          | 1.54          | 83.3          | 1.42          | 35.5          |
| C2       | 1.38          | 0.0           | 1.51          | 53.1          | 1.38          | 0.0           |
| TC2      | 1.38          | 0.2           | 1.50          | 47.1          | 1.39          | 0.2           |
| C3       | 1.39          | 0.0           | 1.53          | 0.12          | 1.39          | 0.0           |
| TC3      | 1.36          | 0.0           | 1.50          | 0.38          | 1.39          | 0.2           |
| C4       | 1.37          | 0.0           | 1.32          | 0.0           | 1.37          | 0.0           |
| TC4      | 1.37          | 0.2           | 1.36          | 0.4           | 1.37          | 0.2           |

**Table S4** Calculated maximum absorption/emission wavelengths ( $\lambda_{\text{abs}}/\lambda_{\text{em}}$ , nm), oscillator strengths ( $f$ ), and transition characters for the investigated materials.

| Material | $\lambda_{\text{abs}}$ | $f$    | Main configurations <sup>a</sup> | $\lambda_{\text{em}}$ | $f$    | Main configurations <sup>a</sup> |
|----------|------------------------|--------|----------------------------------|-----------------------|--------|----------------------------------|
| A1       | 377                    | 0.2113 | H→L (0.97)                       | 476                   | 0.0002 | H→L (0.99)                       |
| TA1      | 418                    | 0.3540 | H→L (0.23);<br>H→L+1 (0.72)      | 575                   | 0      | H→L (0.98)                       |
| A2       | 410                    | 0.2535 | H→L (0.99)                       | 524                   | 0      | H→L (0.99)                       |
| TA2      | 463                    | 0.4333 | H→L (0.81);<br>H→L+2 (0.16)      | 634                   | 0.0001 | H→L (0.98)                       |
| A3       | 381                    | 0.2628 | H→L (0.99)                       | 465                   | 0      | H→L (0.99)                       |
| TA3      | 428                    | 0.4553 | H→L (0.56);<br>H→L+2 (0.36)      | 556                   | 0.0001 | H→L (0.98)                       |
| A4       | 378                    | 0.4020 | H→L (0.98)                       | 464                   | 0      | H→L (0.99)                       |
| TA4      | 418                    | 0.7293 | H→L (0.85)                       | 550                   | 0.0002 | H→L (0.98)                       |
| B1       | 394                    | 0.0045 | H→L (0.99)                       | 501                   | 0.0005 | H→L (0.99)                       |
| TB1      | 441                    | 0.0046 | H→L+2 (0.92)                     | 609                   | 0.0044 | H→L (0.98)                       |
| B2       | 438                    | 0.0064 | H→L (0.99)                       | 539                   | 0.0004 | H→L (0.99)                       |
| TB2      | 497                    | 0.0083 | H→L+1 (0.59);<br>H→L+2 (0.38)    | 676                   | 0.0085 | H→L (0.97)                       |
| B3       | 395                    | 0.0076 | H→L (0.99)                       | 475                   | 0.0005 | H→L (0.99)                       |
| TB3      | 443                    | 0.0110 | H→L+2 (0.97)                     | 576                   | 0.0046 | H→L (0.98)                       |
| B4       | 383                    | 0.0099 | H→L (0.99)                       | 467                   | 0.0004 | H→L (0.99)                       |
| TB4      | 426                    | 0.0132 | H→L+1 (0.91)                     | 556                   | 0.0048 | H→L (0.98)                       |
| C1       | 322                    | 0.1620 | H→L (0.98)                       | 598                   | 0      | H→L (0.99)                       |
| TC1      | 358                    | 0.4200 | H→L (0.67);<br>H→L+1 (0.24)      | 666                   | 0      | H→L (0.97)                       |
| C2       | 317                    | 0.0007 | H-1→L (0.99)                     | 602                   | 0.0002 | H→L (1.00)                       |
| TC2      | 344                    | 0.0195 | H→L+1 (0.61);<br>H→L+2 (0.24)    | 655                   | 0.0003 | H→L (0.98)                       |
| C3       | 329                    | 0.0023 | H→L (0.99)                       | 516                   | 0      | H→L (1.00)                       |
| TC3      | 358                    | 0.0049 | H→L (0.11);<br>H→L+2 (0.84)      | 621                   | 0.0003 | H→L (0.98)                       |
| C4       | 308                    | 0.2133 | H→L (0.90)                       | 353                   | 0.1240 | H→L (0.97)                       |

|     |     |        |                             |     |        |            |
|-----|-----|--------|-----------------------------|-----|--------|------------|
| TC4 | 335 | 0.3914 | H→L (0.58);<br>H→L+1 (0.23) | 364 | 0.2099 | H→L (0.58) |
|-----|-----|--------|-----------------------------|-----|--------|------------|

<sup>a</sup> H denotes the HOMO, and L is the LUMO
